# Supplementary material for: Glucose-enhanced oxidative stress resistance—A protective anticipatory response that enhances the fitness of Candida albicans during systemic infection
Source: PubMed Central journal article supplement (PMC10358912; doi:10.1371/journal.ppat.1011505), 2023-07-10
Supplement: ppat.1011505.s001.pdf [file ppat.1011505.s001.pdf]

Figure S1

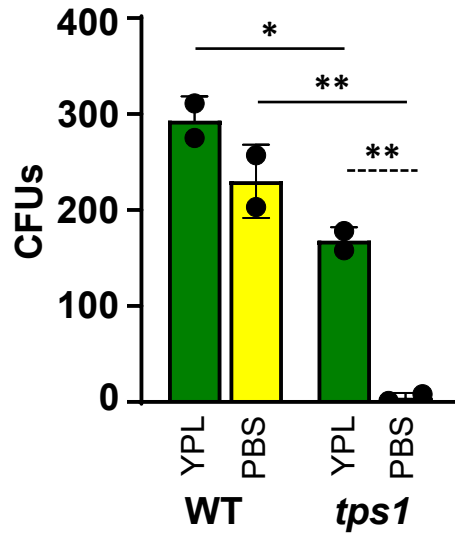

**Figure S1: *tps1* cells are sensitive to hypoosmotic shock (do not survive dilution into PBS).** WT = CAI4 + Clp10. All cells were grown in YPL until  $OD_{600}$  of 0.70 - 0.75. Cells were then diluted into PBS or fresh YPL for 20 minutes before plating onto YPD agar. Each data point represents the mean for 3 technical repeats; means and standard deviations are shown for two independent replicate experiments. Statistical significance in comparison to the WT control was determined by two-way ANOVA with Dunnett multiple comparison for the same condition between strains (filled lines), and unpaired t-test to compare YPL and PBS within the same strain (dotted line). \*  $P < 0.05$  \*\*  $P < 0.01$
