# Supplementary material for: Glucose-enhanced oxidative stress resistance—A protective anticipatory response that enhances the fitness of Candida albicans during systemic infection
Source: PubMed Central journal article supplement (PMC10358912; doi:10.1371/journal.ppat.1011505), 2023-07-10
Supplement: ppat.1011505.s002.pdf [file ppat.1011505.s002.pdf]

**Table S1. Strains used in this study**

| Strain               | Name                  | Parent | Genotype                                                                              | Reference/Source |
|----------------------|-----------------------|--------|---------------------------------------------------------------------------------------|------------------|
| SC5314               | SC5314                | -      | blood isolate                                                                         | 1                |
| CAI4                 | CAI4                  | SC5314 | <i>ura3Δ::imm434/Δura3Δ::imm434</i>                                                   | 2                |
| Ca372                | CAI4+Clp10            | CAI4   | CAI4, <i>RPS1-Clp10 (URA3)</i>                                                        | 3                |
| RM1000               | RM1000                | CAI4   | <i>ura3Δ::imm434/Δura3Δ::imm434, his1Δ::hisG/his1Δ::hisG</i>                          | 4                |
| Ca1674               | RM1000+Clp20          | RM1000 | RIM1000, <i>RPS1-Clp20 (URA3,HIS1)</i>                                                | 5                |
| BWP17                | BWP17                 | RM1000 | <i>ura3Δ::imm434/Δura3Δ::imm434, his1Δ::hisG/his1Δ::hisG, arg4Δ::hisG/arg4Δ::hisG</i> | 6                |
| Ca1206               | BWP17+Clp30           | BWP17  | BWP17, <i>RPS1-Clp30 (URA3,HIS1,ARG4)</i>                                             | 7                |
| SN152                | SN152                 | SC5314 | <i>arg4Δ/arg4Δ, leu2Δ/leu2Δ, his1Δ/his1Δ, URA3/ura3Δ::imm434, IRO1/iro1Δ::imm434</i>  | 8                |
| CM9                  | <i>hgt4Δ</i>          | BWP17  | BWP17, <i>hgt4Δ::UAU1/hgt4Δ::URA3</i>                                                 | 9                |
| CM162                | <i>rgt1Δ</i>          | BWP17  | BWP17, <i>rgt1Δ::FRT/rgt1Δ::FRT</i>                                                   | 9                |
| CM64                 | <i>hgt12Δ</i>         | BWP17  | BWP17, <i>hgt12Δ::UAU1/hgt12Δ::UAU1</i>                                               | 10               |
| <i>hgt1Δ</i>         | <i>hgt1Δ</i>          | SN152  | SN152, <i>hgt1Δ::HIS1/hgt1Δ::LEU2</i>                                                 | 11               |
| <i>HGT1</i>          | <i>HGT1</i>           | SN152  | SN152, <i>hgt1Δ::HIS1/hgt1Δ::LEU2-HGT1</i>                                            | 11               |
| <i>sak1Δ</i>         | <i>sak1Δ</i>          | SC5314 | <i>sak1Δ::FRT/sak1Δ::FRT</i>                                                          | 12               |
| jjh85                | <i>kis1Δ</i>          | BWP17  | BWP17, <i>kis1Δ::UAU1/kis1Δ::UAU1</i>                                                 | 13               |
| <i>snf4Δ</i>         | <i>snf4Δ</i>          | BWP17  | BWP17, <i>snf4Δ::UAU1/snf4Δ::UAU1</i>                                                 | Aaron Mitchell   |
| <i>mig1Δ</i>         | <i>mig1Δ</i>          | SN152  | SN152, <i>mig1Δ::CdHIS1/mig1Δ::CmLEU2</i>                                             | 14               |
| <i>mig2Δ</i>         | <i>mig2Δ</i>          | SN152  | SN152, <i>mig2Δ::CdARG4/mig2Δ::CdARG4</i>                                             | 14               |
| <i>mig1Δ mig2Δ</i>   | <i>mig1Δ mig2Δ</i>    | SN152  | SN152, <i>mig1Δ::CdHIS1/mig1Δ::CmLEU2, mig2Δ::CdARG4/mig2Δ::CdARG4</i>                | 14               |
| <i>ras1-2/ras1-3</i> | <i>ras1Δ</i>          | CAI4   | CAI4, <i>ras1Δ::hisG/ras1Δ::hph-URA3-hph</i>                                          | 15               |
| LR2                  | <i>gpr1Δ</i>          | CAI4   | CAI4, <i>gpr1Δ::hisG/gpr1Δ::hisG-URA3-hisG</i>                                        | 16               |
| NM6                  | <i>gpa2Δ</i>          | CAI4   | CAI4, <i>gpa2Δ::hisG/gpa2Δ::hisG-URA3-hisG</i>                                        | 16               |
| NM23                 | <i>gpr1Δ gpa2Δ</i>    | CAI4   | CAI4, <i>gpa2Δ::hisG/gpa2Δ::hisG, gpr1Δ::hisG/gpr1Δ::hisG-URA3-hisG</i>               | 16               |
| CR323                | <i>cyr1Δ (cdc35Δ)</i> | CAI4   | CAI4, <i>cdc35Δ::hisG/cdc35Δ::hisG, pVEC-URA3</i>                                     | 17               |
| WH2-3U               | <i>pde2Δ</i>          | CAI4   | CAI4, <i>pde2Δ::hisG/pde2Δ::hisG-URA3-hisG</i>                                        | 18               |
| <i>tpk1Δ</i>         | <i>tpk1Δ</i>          | SN152  | SN152, <i>tpk1Δ::HIS1/tpk1Δ::ARG4</i>                                                 | 19               |
| <i>tpk2Δ</i>         | <i>tpk2Δ</i>          | SN152  | SN152, <i>tpk2Δ::HIS1/tpk2Δ::ARG4</i>                                                 | 19               |
| <i>tpk1Δ tpk2Δ</i>   | <i>tpk1Δ tpk2Δ</i>    | SN152  | SN152, <i>tpk1Δ::LEU2/tpk1Δ::FRT, tpk2Δ::HIS1/tpk2Δ::ARG4</i>                         | 19               |
| Ca1862               | <i>CTA1/cta1Δ</i>     | RM1000 | RIM1000, <i>cta1Δ::loxP-URA3-loxP/CTA1</i>                                            | This study       |
| Ca1864               | <i>cta1Δ/cta1Δ</i>    | RM1000 | RIM1000, <i>cta1Δ::loxP-URA3-loxP/cta1Δ::HIS1</i>                                     | This study       |
| Ca2015               | <i>gsh2Δ</i>          | RM1000 | RM1000, <i>gsh2Δ::loxP/gsh2Δ::loxP</i>                                                | 20               |
| C20                  | <i>tps1Δ (ura3)</i>   | CAI4   | CAI4, <i>tps1Δ::hisG/tps1Δ::hisG</i>                                                  | 21               |
| Ca2489               | <i>tps1Δ</i>          | CAI4   | CAI4, <i>tps1Δ::hisG/tps1Δ::hisG, RPS1-Clp10 (URA3)</i>                               | This study       |

| <b>BARCODED <i>C. ALBICANS</i> STRAINS</b>       |                |                                                                                |               |
|--------------------------------------------------|----------------|--------------------------------------------------------------------------------|---------------|
| <b>Genotype:</b> CAI4, RPS1-Clp10-pTET-GW (URA3) |                |                                                                                |               |
| <b>Strain</b>                                    | <b>Barcode</b> | <b>Barcode sequence</b> (common 5' sequence-unique barcode-common 3' sequence) | <b>Source</b> |
| Ca 2247                                          | BC_A03         | CGGTGTCGGTCTCGTAGTACAATAAAGGGCAGGTGCAACCATAGAGACCTCGTGGACATC                   | This study    |
| Ca 2248                                          | BC_A08         | CGGTGTCGGTCTCGTAGCACAGACGACGTAACCTTTATAGGCAGAGACCTCGTGGACATC                   | This study    |
| Ca 2249                                          | BC_A10         | CGGTGTCGGTCTCGTAGTGACCAAGCCTGAATAGCGTCATAAAGAGACCTCGTGGACATC                   | This study    |
| Ca 2250                                          | BC_A11         | CGGTGTCGGTCTCGTAGCGTGTATTAGAGTAATCGCATCTAGAGAGACCTCGTGGACATC                   | This study    |
| Ca 2251                                          | BC_A12         | CGGTGTCGGTCTCGTAGACGAAGCGTGAACCGTATCGAACGCAGAGACCTCGTGGACATC                   | This study    |
| Ca 2252                                          | BC_B04         | CGGTGTCGGTCTCGTAGTAGCGTTAGCGGCCACGGAACATCAAGAGACCTCGTGGACATC                   | This study    |
| Ca 2253                                          | BC_B05         | CGGTGTCGGTCTCGTAGTTAATTGCGGGCAGCCACCGTGAATAGAGACCTCGTGGACATC                   | This study    |
| Ca 2254                                          | BC_B07         | CGGTGTCGGTCTCGTAGTCCTCTCGGGAGGCCAATAGAAACGAGAGACCTCGTGGACATC                   | This study    |
| Ca 2255                                          | BC_B08         | CGGTGTCGGTCTCGTAGTACGCTTGACCCGTGTAGCTGTCAGAGAGACCTCGTGGACATC                   | This study    |
| Ca 2256                                          | BC_B11         | CGGTGTCGGTCTCGTAGTGGTTAACACGGAACCTGAGATCCAGAGACCTCGTGGACATC                    | This study    |
| Ca 2257                                          | BC_C10         | CGGTGTCGGTCTCGTAGTAGCACACCTAGCGTGAACCGAGCCAGAGACCTCGTGGACATC                   | This study    |
| Ca 2258                                          | BC_C11         | CGGTGTCGGTCTCGTAGTCTAATAACCCGGATAGGCATGCCAGAGACCTCGTGGACATC                    | This study    |
| Ca 2259                                          | BC_C12         | CGGTGTCGGTCTCGTAGTTTAAGCATACTCCCATCCGTGCGCAGAGACCTCGTGGACATC                   | This study    |
| Ca 2260                                          | BC_D01         | CGGTGTCGGTCTCGTAGTATCTGAGTGTGCGGGCTATGCAAGAGACCTCTTGGACATC                     | This study    |
| Ca 2261                                          | BC_D02         | CGGTGTCGGTCTCGTAGTAGTTAGGGCGGCCGAAGTTATCCAAGAGACCTCGTGGACATC                   | This study    |

| <b>YEAST SPECIES</b>     |               |                                                            |                                           |
|--------------------------|---------------|------------------------------------------------------------|-------------------------------------------|
| <b>Species</b>           | <b>Strain</b> | <b>Information</b>                                         | <b>Reference/Source</b>                   |
| <i>C. albicans</i>       | SC5314        | Clinical isolate                                           | 1                                         |
| <i>C. dubliniensis</i>   | IHEM20468     | Clinical isolate                                           | D. MacCallum                              |
| <i>C. tropicalis</i>     | SC S74663     | Clinical isolate                                           | D. MacCallum                              |
| <i>L. elongisporus</i>   | NRLL YB-4239  | <i>L. elongisporus</i> often isolated from the environment | J. Heitman                                |
| <i>C. guilliermondii</i> | BB418024      | Clinical isolate                                           | D. MacCallum                              |
| <i>C. glabrata</i>       | AM2004/0093   | Clinical isolate                                           | D. MacCallum                              |
| <i>S. cerevisiae</i>     | BB708832      | Clinical isolate                                           | D. MacCallum                              |
| <i>K. lactis</i>         | NRRL Y-1140   | Isolated from milk                                         | LGC-Promochem (Teddington, Middlesex, UK) |
| <i>Y. lipolytica</i>     | CLIB122       | <i>Y. lipolytica</i> often isolated from foods             | Collection de Levures d'Interet Biotech   |

## References

1. Gillum AM *et al.* (1984) Isolation of the *Candida albicans* gene for orotidine-5'-phosphate decarboxylase by complementation of *S. cerevisiae ura3* and *E. coli pyrF* mutations. *Molec. Gen. Genet.* 198, 179-182.
2. Fonzi WA & Irwin MY (1993) Isogenic strain construction and gene mapping in *Candida albicans*. *Genetics* 134, 717-728.
3. Murad AMA *et al.* (2000) Clp10, an efficient and convenient integrating vector for *Candida albicans*. *Yeast*, 16, 325-327
4. Negredo A *et al.* (1997) Cloning, analysis and one-step disruption of the ARG5,6 gene of *Candida albicans*. *Microbiology* 143, 297-302.
5. Smith DA *et al.* (2004) A conserved stress-activated protein kinase regulates a core stress response in the human pathogen *Candida albicans*. *Molec. Biol. Cell* 15, 4179-4190.
6. Wilson RB *et al.* (1999) Rapid hypothesis testing with *Candida albicans* through gene disruption with short homology regions. *J Bacteriol* 181, 1868-1874.
7. Dennison PM *et al.* (2005) Gene disruption in *Candida albicans* using a synthetic, codon-optimised Cre-loxP system. *Fungal Genet. Biol.* 42, 737-748.
8. Noble SM & Johnson AD (2005) Strains and strategies for large-scale gene deletion studies of the diploid human fungal pathogen *Candida albicans*. *Eukaryot Cell*. 4, 298-309.
9. Sexton JA *et al.* (2007) Regulation of sugar transport and metabolism by the *Candida albicans* Rgt1 transcriptional repressor. *Yeast*, 24, 847-860.
10. Brown *et al.* (2006) A glucose sensor in *Candida albicans*. *Eukaryotic Cell* 5: 1726-1737.
11. Kenno S *et al.* (2019) *Candida albicans* Factor H Binding Molecule Hgt1p – A low glucose-induced transmembrane protein is trafficked to the cell wall and impairs phagocytosis and killing by human neutrophils. *Frontiers Microbiol* 9, 3319.
12. Ramirez-Zavala *et al.* (2017) The Snf1-activating kinase Sak1 is a key regulator of metabolic adaptation and in vivo fitness of *Candida albicans*. *Molec Microbiol* 104, 989-1007.
13. Blankenship JR *et al.* (2010) An extensive circuitry for cell wall regulation in *Candida albicans*. *PLoS Pathog* 6: e1000752.
14. Lagree K *et al.* (2020) Roles of *Candida albicans* Mig1 and Mig2 in glucose repression, pathogenicity traits, and SNF1 essentiality. *PLOS Genet* 16, e1008582.
15. Feng Q *et al.* (1999) Ras signaling is required for serum-induced hyphal differentiation in *Candida albicans*. *J Bacteriol* 181, 6339-6346.
16. Maidan MM *et al.* (2005) The G protein-coupled receptor Gpr1 and the Galpha protein Gpa2 act through the cAMP-protein kinase A pathway to induce morphogenesis in *Candida albicans*. *Molec Biol Cell*. 16, 971-1986.
17. Rocha CRC *et al.* (2001) Signaling through adenylyl cyclase is essential for hyphal growth and virulence in the pathogenic fungus *Candida albicans*. *Molec Biol Cell* 12, 3631-3643.
18. Jung WH & Stateva LI (2003) The cAMP phosphodiesterase encoded by *CaPDE2* is required for hyphal development in *Candida albicans*. *Microbiology* 149, 2961-2976.
19. Cao C *et al.* (2017) Global regulatory roles of the cAMP/PKA pathway revealed by phenotypic, transcriptomic and phosphoproteomic analyses in a null mutant of the PKA catalytic subunit in *Candida albicans*. *Molec Microbiol* 105, 46-64.
20. Shahana S *et al.* (2014) New Clox systems for rapid and efficient gene disruption in *Candida albicans*. *PLoS ONE* 9, e100390.
21. Zaragoza O *et al.* (1998). Disruption of the *Candida albicans* *TPS1* gene encoding trehalose-6- phosphate synthase impairs formation of hyphae and decreases infectivity. *J Bacteriol* 180, 3809-3815.
