# Supplementary material for: Glucose-enhanced oxidative stress resistance—A protective anticipatory response that enhances the fitness of Candida albicans during systemic infection
Source: PubMed Central journal article supplement (PMC10358912; doi:10.1371/journal.ppat.1011505), 2023-07-10
Supplement: ppat.1011505.s003.pdf [file ppat.1011505.s003.pdf]

**Table S2. Barcodes and Primers used in barcode sequencing.**

| Barcode ID                    | Sequence (5' -> 3')                                          |
|-------------------------------|--------------------------------------------------------------|
| A03                           | CGGTGTCGGTCTCGTAGTACAATAAAGGGCAGGTGCAACCATAGAGACCTCGTGGACATC |
| A10                           | CGGTGTCGGTCTCGTAGTGACCAAGCCTGAATAGCGTCATAAAGAGACCTCGTGGACATC |
| A12                           | CGGTGTCGGTCTCGTAGACGAAGCGTGAAACGTATCGAACGCAGAGACCTCGTGGACATC |
| B04                           | CGGTGTCGGTCTCGTAGTAGCGTTAGCGGCCACGGAACATCAAGAGACCTCGTGGACATC |
| B05                           | CGGTGTCGGTCTCGTAGTTAATTGCGGGCAGCCACCGTGAATAGAGACCTCGTGGACATC |
| B07                           | CGGTGTCGGTCTCGTAGTCTCTCGGGAGGCCAATAGAAACGAGAGACCTCGTGGACATC  |
| C12                           | CGGTGTCGGTCTCGTAGTTTAAGCATACTCCCATCCGTGCGCAGAGACCTCGTGGACATC |
| D02                           | CGGTGTCGGTCTCGTAGTAGTTAGGGCGGCCGAAGTTATCCAAGAGACCTCGTGGACATC |
| A08                           | CGGTGTCGGTCTCGTAGCACAGACGACGTAACTTTTATAGGCAGAGACCTCGTGGACATC |
| A11                           | CGGTGTCGGTCTCGTAGCGTGTATTAGAGTAATCGCATCTAGAGAGACCTCGTGGACATC |
| B08                           | CGGTGTCGGTCTCGTAGTACGCTTGACCCGTGTAGCTGTCAGAGAGACCTCGTGGACATC |
| B11                           | CGGTGTCGGTCTCGTAGTGGTTAACACGGAACCTGAGATCCCAGAGACCTCGTGGACATC |
| C10                           | CGGTGTCGGTCTCGTAGTAGCACACCTAGCGTGAACCGAGCCAGAGACCTCGTGGACATC |
| C11                           | CGGTGTCGGTCTCGTAGTCTAATAACCCCGGATAGGCATGCCAGAGACCTCGTGGACATC |
| D01                           | CGGTGTCGGTCTCGTAGTATCTGAGTGTTTGCGGGCTATGCAAGAGACCTCTTGGACATC |
| Barcode amplification primers | Sequence (5' -> 3')                                          |
| seqBC_F                       | TCGTCGGCAGCGTCAGATGTGTATAAGAGACAGCGCTCTTCCGATCTCCTAGG        |
| seqBC_R                       | GTCTCGTGGGCTCGGAGATGTGTATAAGAGACAGGATAGCCGCGCTGCTAGC         |

**Table S2: Barcodes and Primers used in barcode sequencing.** The isogenic set of barcoded wild type *C. albicans* strains was generated in the parental strain *C. albicans* CAI4 using Clp10-PTET-GTW plasmids containing the barcodes described here. These plasmids, which are from the *C. albicans* ORFeome project [1,2], were generously provided by Professor Carol Munro.

## References

1. Cabral V, Znaidi S, Walker LA, Martin-Yken H, Dague E, Legrand M, et al. Targeted changes of the cell wall proteome influence *Candida albicans* ability to form single- and multi-strain biofilms. *PLoS Pathog.* 2014;10: e1004542.
2. Chauvel M, Bachellier-Bassi S, Guérout AM, Lee KK, Maufrais C, Permal E, et al. High-throughput functional profiling of the human fungal pathogen *Candida albicans* genome. *Res Microbiol.* 2023; 174: 104025.
